# Supplementary material for: Heat-Related Training and Educational Material Needs among Oil Spill Cleanup Responders
Source: PubMed Central journal article supplement — Environ Health Insights. 2018 Sep 24;12:1178630218802295. doi: 10.1177/1178630218802295 (PMC6153533; doi:10.1177/1178630218802295), 2018-09-24
Supplement: Survey_Questions_032817_xyz8846d5c3617e_(1).pdf [file Survey_Questions_032817_xyz8846d5c3617e_%281%29.pdf]

# Oil Spill Cleanup Responder Survey

| <b>BASIC INFORMATION</b> |                                                                                                                                                                                                                                                                                                                                               |
|--------------------------|-----------------------------------------------------------------------------------------------------------------------------------------------------------------------------------------------------------------------------------------------------------------------------------------------------------------------------------------------|
| A-1.                     | <p><b>During oil spill cleanup activities, please select if you are a/an:</b></p> <p><input type="radio"/> Safety and Health Professional    <input type="radio"/> Employer    <input type="radio"/> Supervisor</p> <p><input type="radio"/> Employee/Worker    <input type="radio"/> Other _____</p>                                         |
| A-2.                     | <p><b>How many people work for your company/organization?</b></p> <p><input type="radio"/> 1-9    <input type="radio"/> 10-19    <input type="radio"/> 20-49    <input type="radio"/> 50-99    <input type="radio"/> 100+</p>                                                                                                                 |
| A-3.                     | <p><b>How many years have you been involved with oil spill cleanups?</b></p> <p>_____</p>                                                                                                                                                                                                                                                     |
| A-4.                     | <p><b>What state do you currently work in?</b></p> <p>_____</p>                                                                                                                                                                                                                                                                               |
| A-5.                     | <p><b>Do you respond to oil spill cleanups in other states/countries?</b></p> <p><input type="radio"/> Yes    <input type="radio"/> No</p> <p><b>If you answered YES to the previous question, in what other states/countries have you responded to oil spill cleanups? (If you answered NO, please skip this question.)</b></p> <p>_____</p> |

| <b>HEAT EXPERIENCES AT WORK</b> |                                                                                                                                                                                                                                   |
|---------------------------------|-----------------------------------------------------------------------------------------------------------------------------------------------------------------------------------------------------------------------------------|
| B-1.                            | <p><b>On average, how many emergency oil spill cleanups do you usually respond to in a year?</b></p> <p>_____</p>                                                                                                                 |
| B-2.                            | <p><b>During oil spill cleanups, on average, how long is your shift?</b></p> <p>_____</p>                                                                                                                                         |
| B-3.                            | <p><b>How many breaks do you usually take during a shift while working on oil spill cleanups?</b></p> <p><input type="radio"/> 1    <input type="radio"/> 2-3    <input type="radio"/> 4-5    <input type="radio"/> 6 or more</p> |
| B-4.                            | <p><b>During oil spill cleanups, I have experienced the following (check all that apply):</b></p>                                                                                                                                 |

- Temperatures above 80°F
- Temperatures above 90°F
- Temperatures above 100°F
- High humidity
- Wearing personal protective equipment (PPE) ensembles that cover parts of my body
- Wearing a respirator
- Wearing a personal flotation device (PFD/life jacket)
- Other heat-related hazard \_\_\_\_\_

B-5. **During oil spill cleanups, I have experienced the following symptoms of heat-related illnesses (check all that apply):**

- dizziness    headache    irritability    cramps    confusion
- profuse sweating    seizures    fainting    nausea    vomiting
- weakness    decreased urine output    dark urine    heat rash
- high body temperature and/or flushed skin    other \_\_\_\_\_

B-6. **During oil spill cleanups, I was told by a medical professional that I was experiencing the following heat-related illness (check all that apply):**

- heat stroke    heat exhaustion    rhabdomyolysis    heat cramps
- heat syncope    heat rash

B-7. **During oil spill cleanups, I have experienced the following heat-related injuries (check all that apply):**

- burns from hot equipment    accident related to fogged up glasses
- falls from dizziness    other \_\_\_\_\_

B-8. **During an oil spill cleanup response, what percent of your shift are you performing the following types of activities? (Total should equal 100%)**

|                                                                                   | 0%                    | 25%                   | 50%                   | 75%                   | 100%                  |
|-----------------------------------------------------------------------------------|-----------------------|-----------------------|-----------------------|-----------------------|-----------------------|
| light activities (sit/stand, slow walk, inspecting visually)                      | <input type="radio"/> |
| moderate activities (walking, surveying environment, working with hands and arms) | <input type="radio"/> |
| heavy activities (handling lighter equipment, physically active)                  | <input type="radio"/> |

|      |                                                                                                                                                                                                                                                                                                                                                                                                                                                                                                                                                                                                                                                                                                                                                                                                                                                                         |   |   |   |   |   |
|------|-------------------------------------------------------------------------------------------------------------------------------------------------------------------------------------------------------------------------------------------------------------------------------------------------------------------------------------------------------------------------------------------------------------------------------------------------------------------------------------------------------------------------------------------------------------------------------------------------------------------------------------------------------------------------------------------------------------------------------------------------------------------------------------------------------------------------------------------------------------------------|---|---|---|---|---|
|      | very heavy activities (handling heavy equipment, very physically active doing strenuous work)                                                                                                                                                                                                                                                                                                                                                                                                                                                                                                                                                                                                                                                                                                                                                                           | ○ | ○ | ○ | ○ | ○ |
| B-9. | <p><b>My work provides the following (check all that apply):</b></p> <input type="checkbox"/> Preplacement medical evaluation<br><input type="checkbox"/> Annual medical evaluation<br><input type="checkbox"/> Training on heat stress<br><input type="checkbox"/> Acclimatization plan (easing into a hot/strenuous job over multiple days; starting with lighter work or shorter shifts and gradually adding on more work each day)<br><input type="checkbox"/> Work/rest schedules<br><input type="checkbox"/> Shaded or cooled area for rest breaks<br><input type="checkbox"/> Access to drinking water<br><input type="checkbox"/> Buddy system<br><input type="checkbox"/> Weather monitoring<br><input type="checkbox"/> Mandatory “stop work” rules based on whether it will be too hot<br><input type="checkbox"/> Water-cooled or air-cooled garments/vests |   |   |   |   |   |

| <b>Heat Stress</b>                                                                              |      |       |        |
|-------------------------------------------------------------------------------------------------|------|-------|--------|
| <b>C-1. True or False</b>                                                                       | True | False | Unsure |
| Some medications may affect tolerance to the heat                                               | ○    | ○     | ○      |
| The difference between heat exhaustion and heat stroke is there is no sweating with heat stroke | ○    | ○     | ○      |
| Dark, infrequent urination may mean I am dehydrated                                             | ○    | ○     | ○      |
| High humidity is a risk factor for heat stress                                                  | ○    | ○     | ○      |
| Taking a break in the air conditioning will ruin your acclimatization                           | ○    | ○     | ○      |
| Having a previous heat-related illness puts you at higher risk for another heat-related illness | ○    | ○     | ○      |
| Salt tablets are an effective way to restore electrolytes lost during sweating                  | ○    | ○     | ○      |
| Heat stroke is not always a medical emergency                                                   | ○    | ○     | ○      |

| <b>HEAT STRESS SEVERITY</b>                                                                                         |                          |                       |                       |                       |                       |
|---------------------------------------------------------------------------------------------------------------------|--------------------------|-----------------------|-----------------------|-----------------------|-----------------------|
| <b>D-1. During oil spill cleanup activities:</b>                                                                    | <b>Strongly disagree</b> | <b>Disagree</b>       | <b>Neutral</b>        | <b>Agree</b>          | <b>Strongly agree</b> |
| I am concerned about becoming ill from working in a hot environment because heat-related illnesses can be dangerous | <input type="radio"/>    | <input type="radio"/> | <input type="radio"/> | <input type="radio"/> | <input type="radio"/> |
| Other oil spill cleanup workers may suffer from a heat-related illness because it is a hot, hard job                | <input type="radio"/>    | <input type="radio"/> | <input type="radio"/> | <input type="radio"/> | <input type="radio"/> |
| Heat stroke can lead to death                                                                                       | <input type="radio"/>    | <input type="radio"/> | <input type="radio"/> | <input type="radio"/> | <input type="radio"/> |
| As long as I am still sweating, I am ok                                                                             | <input type="radio"/>    | <input type="radio"/> | <input type="radio"/> | <input type="radio"/> | <input type="radio"/> |
| I have mentioned to my supervisor that it may be too hot to finish a task                                           | <input type="radio"/>    | <input type="radio"/> | <input type="radio"/> | <input type="radio"/> | <input type="radio"/> |

| <b>HEAT-RELATED ILLNESSES AND FIRST AID</b>                                          |                          |                       |                       |                       |                       |
|--------------------------------------------------------------------------------------|--------------------------|-----------------------|-----------------------|-----------------------|-----------------------|
| <b>E-1. During oil spill cleanup activities:</b>                                     | <b>Strongly disagree</b> | <b>Disagree</b>       | <b>Neutral</b>        | <b>Agree</b>          | <b>Strongly agree</b> |
| I feel confident I can recognize the signs and symptoms of heat-related illnesses    | <input type="radio"/>    | <input type="radio"/> | <input type="radio"/> | <input type="radio"/> | <input type="radio"/> |
| I feel confident in distinguishing between heat exhaustion and heat stroke           | <input type="radio"/>    | <input type="radio"/> | <input type="radio"/> | <input type="radio"/> | <input type="radio"/> |
| I feel confident administering first aid for heat-related fainting and heat cramps   | <input type="radio"/>    | <input type="radio"/> | <input type="radio"/> | <input type="radio"/> | <input type="radio"/> |
| I feel confident in contacting emergency medical services for a heat-related illness | <input type="radio"/>    | <input type="radio"/> | <input type="radio"/> | <input type="radio"/> | <input type="radio"/> |
| If a coworker became ill because of the heat, I worry I won't know what to do        | <input type="radio"/>    | <input type="radio"/> | <input type="radio"/> | <input type="radio"/> | <input type="radio"/> |

| <b>HYDRATION AND REST BREAKS</b>                                               |                          |                       |                       |                       |                       |
|--------------------------------------------------------------------------------|--------------------------|-----------------------|-----------------------|-----------------------|-----------------------|
| <b>F-1. During oil spill cleanup activities:</b>                               | <b>Strongly disagree</b> | <b>Disagree</b>       | <b>Neutral</b>        | <b>Agree</b>          | <b>Strongly agree</b> |
| Taking a break to rest will make me look weak in front of coworkers            | <input type="radio"/>    | <input type="radio"/> | <input type="radio"/> | <input type="radio"/> | <input type="radio"/> |
| I get too busy to take breaks                                                  | <input type="radio"/>    | <input type="radio"/> | <input type="radio"/> | <input type="radio"/> | <input type="radio"/> |
| Access to water is too far away                                                | <input type="radio"/>    | <input type="radio"/> | <input type="radio"/> | <input type="radio"/> | <input type="radio"/> |
| I'm never sure how long to rest                                                | <input type="radio"/>    | <input type="radio"/> | <input type="radio"/> | <input type="radio"/> | <input type="radio"/> |
| I'm never sure how much I should drink                                         | <input type="radio"/>    | <input type="radio"/> | <input type="radio"/> | <input type="radio"/> | <input type="radio"/> |
| I do not like the taste of water                                               | <input type="radio"/>    | <input type="radio"/> | <input type="radio"/> | <input type="radio"/> | <input type="radio"/> |
| My PPE is too burdensome to remove or put back on, so I try not to take breaks | <input type="radio"/>    | <input type="radio"/> | <input type="radio"/> | <input type="radio"/> | <input type="radio"/> |
| My supervisor regularly encourages me to take a break                          | <input type="radio"/>    | <input type="radio"/> | <input type="radio"/> | <input type="radio"/> | <input type="radio"/> |

| <b>TRAINING AND EDUCATIONAL MATERIALS</b>                                                                |                          |                       |                       |                       |                       |
|----------------------------------------------------------------------------------------------------------|--------------------------|-----------------------|-----------------------|-----------------------|-----------------------|
| <b>G-1. I have received sufficient training on:</b>                                                      | <b>Strongly disagree</b> | <b>Disagree</b>       | <b>Neutral</b>        | <b>Agree</b>          | <b>Strongly agree</b> |
| Recognition of signs and symptoms of heat-related illnesses                                              | <input type="radio"/>    | <input type="radio"/> | <input type="radio"/> | <input type="radio"/> | <input type="radio"/> |
| First aid for heat-related illnesses and procedures for contacting emergency medical services            | <input type="radio"/>    | <input type="radio"/> | <input type="radio"/> | <input type="radio"/> | <input type="radio"/> |
| Environmental risk factors (temperature, humidity, air movement)                                         | <input type="radio"/>    | <input type="radio"/> | <input type="radio"/> | <input type="radio"/> | <input type="radio"/> |
| Personal risk factors for heat-related illnesses (medications, physical condition, health problems, age) | <input type="radio"/>    | <input type="radio"/> | <input type="radio"/> | <input type="radio"/> | <input type="radio"/> |
| Proper hydration (what you should drink, how much, how often)                                            | <input type="radio"/>    | <input type="radio"/> | <input type="radio"/> | <input type="radio"/> | <input type="radio"/> |
| Added heat load caused by exertion, clothing, and PPE                                                    | <input type="radio"/>    | <input type="radio"/> | <input type="radio"/> | <input type="radio"/> | <input type="radio"/> |
| Acclimatization (how to achieve and maintain)                                                            | <input type="radio"/>    | <input type="radio"/> | <input type="radio"/> | <input type="radio"/> | <input type="radio"/> |
| Importance of immediately reporting signs or symptoms of heat-related illness to a supervisor            | <input type="radio"/>    | <input type="radio"/> | <input type="radio"/> | <input type="radio"/> | <input type="radio"/> |

|                                                                                                                    |                          |                       |                       |                       |                       |
|--------------------------------------------------------------------------------------------------------------------|--------------------------|-----------------------|-----------------------|-----------------------|-----------------------|
| Monitoring weather reports and responding to hot weather advisories                                                | <input type="radio"/>    | <input type="radio"/> | <input type="radio"/> | <input type="radio"/> | <input type="radio"/> |
| Using a work/rest schedule                                                                                         | <input type="radio"/>    | <input type="radio"/> | <input type="radio"/> | <input type="radio"/> | <input type="radio"/> |
| <b>G-2. I want more training/education on:</b>                                                                     | <b>Strongly disagree</b> | <b>Disagree</b>       | <b>Neutral</b>        | <b>Agree</b>          | <b>Strongly agree</b> |
| Recognition of signs and symptoms of heat-related illnesses (heat cramps, heat rash, heat exhaustion, heat stroke) | <input type="radio"/>    | <input type="radio"/> | <input type="radio"/> | <input type="radio"/> | <input type="radio"/> |
| First aid for heat-related illnesses and procedures for contacting emergency medical services                      | <input type="radio"/>    | <input type="radio"/> | <input type="radio"/> | <input type="radio"/> | <input type="radio"/> |
| Environmental risk factors (temperature, humidity, air movement)                                                   | <input type="radio"/>    | <input type="radio"/> | <input type="radio"/> | <input type="radio"/> | <input type="radio"/> |
| Personal risk factors for heat-related illnesses (medications, physical condition, health problems, age)           | <input type="radio"/>    | <input type="radio"/> | <input type="radio"/> | <input type="radio"/> | <input type="radio"/> |
| Proper hydration (what you should drink, how much, how often)                                                      | <input type="radio"/>    | <input type="radio"/> | <input type="radio"/> | <input type="radio"/> | <input type="radio"/> |
| Added heat load caused by exertion, clothing, and PPE                                                              | <input type="radio"/>    | <input type="radio"/> | <input type="radio"/> | <input type="radio"/> | <input type="radio"/> |
| Acclimatization (how to achieve and maintain)                                                                      | <input type="radio"/>    | <input type="radio"/> | <input type="radio"/> | <input type="radio"/> | <input type="radio"/> |
| Importance of immediately reporting signs or symptoms of heat-related illness to a supervisor                      | <input type="radio"/>    | <input type="radio"/> | <input type="radio"/> | <input type="radio"/> | <input type="radio"/> |
| Monitoring weather reports and responding to hot weather advisories                                                | <input type="radio"/>    | <input type="radio"/> | <input type="radio"/> | <input type="radio"/> | <input type="radio"/> |
| Using a work/rest schedule                                                                                         | <input type="radio"/>    | <input type="radio"/> | <input type="radio"/> | <input type="radio"/> | <input type="radio"/> |

|      |                                                                                                                                                                                                                                                                                                                                                                                                                                                                                                                                                                                                                                                                                                                                                                                                                                                                                             |
|------|---------------------------------------------------------------------------------------------------------------------------------------------------------------------------------------------------------------------------------------------------------------------------------------------------------------------------------------------------------------------------------------------------------------------------------------------------------------------------------------------------------------------------------------------------------------------------------------------------------------------------------------------------------------------------------------------------------------------------------------------------------------------------------------------------------------------------------------------------------------------------------------------|
| G-3. | <p><b>I currently receive the following types of heat stress training and educational materials (check all that apply):</b></p> <ul style="list-style-type: none"> <li><input type="checkbox"/> All-day training with instructor</li> <li><input type="checkbox"/> Half-day training with instructor</li> <li><input type="checkbox"/> Just-in-Time training (short talks at a work-site prior to the start of a shift)</li> <li><input type="checkbox"/> Online training course with multiple modules that could be taken as needed</li> <li><input type="checkbox"/> Posters</li> <li><input type="checkbox"/> Printed educational materials suitable for keeping in a pocket, toolbox, or vehicle glovebox</li> <li><input type="checkbox"/> Smart phone or tablet app</li> <li><input type="checkbox"/> Other heat stress training or educational materials _____</li> </ul>            |
| G-4. | <p><b>I would like to have access to the following types of heat stress training and educational materials (check all that apply):</b></p> <ul style="list-style-type: none"> <li><input type="checkbox"/> All-day training with instructor</li> <li><input type="checkbox"/> Half-day training with instructor</li> <li><input type="checkbox"/> Just-in-Time training (short talks at a work-site prior to the start of a shift)</li> <li><input type="checkbox"/> Online training course with multiple modules that could be taken as needed</li> <li><input type="checkbox"/> Posters</li> <li><input type="checkbox"/> Printed educational materials suitable for keeping in a pocket, toolbox, or vehicle glovebox</li> <li><input type="checkbox"/> Smart phone or tablet app</li> <li><input type="checkbox"/> Other heat stress training or educational materials _____</li> </ul> |

**DEMOGRAPHICS**

*Reminder: Information gathered through this survey will be combined and kept confidential.*

|      |                                                                                                                                                                                                                                                                                                                                                                                                                                                                                             |
|------|---------------------------------------------------------------------------------------------------------------------------------------------------------------------------------------------------------------------------------------------------------------------------------------------------------------------------------------------------------------------------------------------------------------------------------------------------------------------------------------------|
| H-1. | <b>Age?</b><br><input type="radio"/> 18-29 <input type="radio"/> 30-39 <input type="radio"/> 40-49 <input type="radio"/> 50-59 <input type="radio"/> 60+                                                                                                                                                                                                                                                                                                                                    |
| H-2. | <b>Sex?</b><br><input type="radio"/> Male <input type="radio"/> Female                                                                                                                                                                                                                                                                                                                                                                                                                      |
| H-3. | <b>What is the highest level of education you have achieved?</b><br><input type="radio"/> Some high school<br><input type="radio"/> High school diploma<br><input type="radio"/> GED<br><input type="radio"/> Trade/vocational school<br><input type="radio"/> Some college<br><input type="radio"/> Associate's degree<br><input type="radio"/> Bachelor's degree<br><input type="radio"/> Graduate (e.g., MS, PhD) or Professional (e.g., MD) degree<br><input type="radio"/> Other _____ |
| H-4. | <b>Race/Ethnicity?</b><br><input type="radio"/> African American/Black <input type="radio"/> Asian/Pacific Islander <input type="radio"/> Caucasian<br><input type="radio"/> Hispanic/Latino <input type="radio"/> American Indian/Alaska Native<br><input type="radio"/> Other _____                                                                                                                                                                                                       |
